# Supplementary material for: The coupling of Phanerozoic continental weathering and marine phosphorus cycle
Source: PubMed Central journal article supplement (PMC7118102; doi:10.1038/s41598-020-62816-z), 2020-04-02
Supplement: 41598_2020_62816_MOESM1_ESM.pdf [file 41598_2020_62816_MOESM1_ESM.pdf]

# **The coupling of Phanerozoic continental weathering and marine phosphorus cycle**

Ruimin Wang<sup>a</sup>, Xianguo Lang<sup>b</sup>, Weiming Ding<sup>a</sup>, Yarong Liu<sup>a</sup>, Tianzheng Huang<sup>a</sup>, Wenbo Tang<sup>c</sup>,

Bing Shen<sup>a,\*</sup>

supplementary information include:

Table 1: Carbon and Strontium isotopes and the modeling outputs

Table 2: Parameters used in the simulation

Table.S1. Carbon and Strontium isotopes and the modeling outputs

| t <sub>1</sub><br>(Ma) | t <sub>2</sub><br>(Ma) | δ <sup>13</sup> C <sub>1</sub><br>(‰) | δ <sup>13</sup> C <sub>2</sub><br>(‰) | <sup>87</sup> Sr/ <sup>86</sup> Sr <sub>t1</sub> | <sup>87</sup> Sr/ <sup>86</sup> Sr <sub>t2</sub> | F <sub>hy</sub><br>(Tg/yr) | F <sub>Sr</sub><br>(Tg/yr) | F <sub>org-mean</sub><br>(Tg/yr) | F <sub>org-std</sub><br>(Tg/yr) | F <sub>in-mean</sub> <sup>P</sup><br>(Tg/yr) | F <sub>in-std</sub> <sup>P</sup><br>(Tg/yr) | R <sub>p-mean</sub> | R <sub>p-std</sub> |
|------------------------|------------------------|---------------------------------------|---------------------------------------|--------------------------------------------------|--------------------------------------------------|----------------------------|----------------------------|----------------------------------|---------------------------------|----------------------------------------------|---------------------------------------------|---------------------|--------------------|
| 540                    | 531                    | -4.00                                 | 5.00                                  | 0.7083                                           | 0.7081                                           | 2.27                       | 2.74                       | 87.67                            | 9.00                            | 1.10                                         | 0.11                                        | 0.291               | 0.030              |
| 531                    | 528                    | 5.00                                  | -2.00                                 |                                                  |                                                  |                            |                            | 26.63                            | 0.60                            | 1.81                                         | 0.19                                        | 0.054               | 0.001              |
| 528                    | 525                    | -2.00                                 | 6.00                                  |                                                  |                                                  |                            |                            | 132.31                           | 10.20                           | 1.81                                         | 0.19                                        | 0.267               | 0.021              |
| 525                    | 523                    | 6.00                                  | -4.00                                 | 0.7081                                           | 0.7091                                           | 2.27                       | 4.51                       | 0.21                             | 1.80                            | 1.81                                         | 0.19                                        | 0.000               | 0.004              |
| 523                    | 518                    | -4.00                                 | 1.00                                  |                                                  |                                                  |                            |                            | 66.26                            | 4.20                            | 1.81                                         | 0.19                                        | 0.134               | 0.009              |
| 518                    | 497                    | 1.00                                  | 1.00                                  |                                                  |                                                  |                            |                            | 66.26                            | 4.20                            | 1.81                                         | 0.19                                        | 0.134               | 0.009              |
| 497                    | 495                    | 1.00                                  | 4.00                                  |                                                  |                                                  |                            |                            | 89.11                            | 7.80                            | 1.39                                         | 0.14                                        | 0.234               | 0.021              |
| 495                    | 494                    | 4.00                                  | 1.00                                  |                                                  |                                                  |                            |                            | 55.04                            | 4.22                            | 1.39                                         | 0.14                                        | 0.145               | 0.011              |
| 494                    | 465                    | 1.00                                  | -1.00                                 | 0.7091                                           | 0.7087                                           | 2.13                       | 3.46                       | 32.38                            | 1.80                            | 1.39                                         | 0.14                                        | 0.085               | 0.005              |
| 465                    | 463                    | -1.00                                 | 1.00                                  |                                                  |                                                  |                            |                            | 55.07                            | 4.20                            | 1.39                                         | 0.14                                        | 0.145               | 0.011              |
| 463                    | 459                    | 1.00                                  | -3.00                                 |                                                  |                                                  |                            |                            | 5.68                             | 0.60                            | 0.94                                         | 0.10                                        | 0.022               | 0.002              |
| 459                    | 453                    | -3.00                                 | 0.00                                  | 0.7087                                           | 0.7079                                           | 2.13                       | 2.33                       | 33.69                            | 3.00                            | 0.94                                         | 0.10                                        | 0.131               | 0.012              |
| 453                    | 446                    | 0.00                                  | 0.00                                  |                                                  |                                                  |                            |                            | 33.69                            | 3.00                            | 0.94                                         | 0.10                                        | 0.131               | 0.012              |
| 446                    | 445                    | 0.00                                  | 7.00                                  |                                                  |                                                  |                            |                            | 99.26                            | 11.28                           | 0.94                                         | 0.10                                        | 0.387               | 0.044              |
| 445                    | 443                    | 7.00                                  | 1.00                                  |                                                  |                                                  |                            |                            | 55.60                            | 4.20                            | 1.41                                         | 0.15                                        | 0.144               | 0.011              |
| 443                    | 434                    | 1.00                                  | 1.00                                  |                                                  |                                                  |                            |                            | 55.60                            | 4.20                            | 1.41                                         | 0.15                                        | 0.144               | 0.011              |
| 434                    | 433                    | 1.00                                  | 5.00                                  | 0.7079                                           | 0.7087                                           | 2.13                       | 3.51                       | 101.38                           | 8.98                            | 1.41                                         | 0.15                                        | 0.263               | 0.023              |
| 433                    | 431                    | 5.00                                  | 0.00                                  |                                                  |                                                  |                            |                            | 44.17                            | 3.00                            | 1.41                                         | 0.15                                        | 0.114               | 0.008              |
| 431                    | 425                    | 0.00                                  | 0.00                                  |                                                  |                                                  |                            |                            | 44.17                            | 3.00                            | 1.41                                         | 0.15                                        | 0.114               | 0.008              |
| 425                    | 424                    | 0.00                                  | 8.00                                  |                                                  |                                                  |                            |                            | 100.86                           | 12.41                           | 0.80                                         | 0.08                                        | 0.461               | 0.057              |
| 424                    | 421                    | 8.00                                  | 0.00                                  |                                                  |                                                  |                            |                            | 30.67                            | 3.00                            | 0.80                                         | 0.08                                        | 0.140               | 0.014              |
| 421                    | 419                    | 0.00                                  | 4.00                                  | 0.7087                                           | 0.7078                                           | 1.94                       | 1.99                       | 65.61                            | 7.80                            | 0.80                                         | 0.08                                        | 0.300               | 0.036              |
| 419                    | 416                    | 4.00                                  | 0.00                                  |                                                  |                                                  |                            |                            | 30.67                            | 3.00                            | 0.80                                         | 0.08                                        | 0.140               | 0.014              |
| 416                    | 414                    | 0.00                                  | 2.00                                  |                                                  |                                                  |                            |                            | 48.14                            | 5.40                            | 0.80                                         | 0.08                                        | 0.220               | 0.025              |
| 414                    | 393                    | 2.00                                  | 1.00                                  |                                                  |                                                  |                            |                            | 39.41                            | 4.20                            | 0.80                                         | 0.08                                        | 0.180               | 0.019              |
| 393                    | 368                    | 1.00                                  | 0.00                                  | 0.7078                                           | 0.7082                                           | 1.94                       | 2.46                       | 34.85                            | 3.00                            | 0.99                                         | 0.10                                        | 0.129               | 0.011              |
| 368                    | 360                    | 0.00                                  | 5.00                                  |                                                  |                                                  |                            |                            | 82.69                            | 9.00                            | 0.99                                         | 0.10                                        | 0.306               | 0.033              |
| 360                    | 359                    | 5.00                                  | 2.00                                  |                                                  |                                                  |                            |                            | 49.65                            | 5.47                            | 0.85                                         | 0.09                                        | 0.213               | 0.023              |
| 359                    | 357                    | 2.00                                  | 7.00                                  | 0.7082                                           | 0.7079                                           | 1.94                       | 2.12                       | 94.59                            | 11.40                           | 0.85                                         | 0.09                                        | 0.406               | 0.049              |
| 357                    | 355                    | 7.00                                  | 2.00                                  |                                                  |                                                  |                            |                            | 49.76                            | 5.40                            | 0.85                                         | 0.09                                        | 0.213               | 0.023              |
| 355                    | 338                    | 2.00                                  | 2.00                                  |                                                  |                                                  |                            |                            | 49.76                            | 5.40                            | 0.85                                         | 0.09                                        | 0.213               | 0.023              |
| 338                    | 333                    | 2.00                                  | 0.00                                  |                                                  |                                                  |                            |                            | 31.12                            | 3.00                            | 0.82                                         | 0.08                                        | 0.139               | 0.013              |
| 333                    | 332                    | 0.00                                  | 2.00                                  | 0.7079                                           | 0.7083                                           | 1.56                       | 2.04                       | 48.84                            | 5.35                            | 0.82                                         | 0.08                                        | 0.218               | 0.024              |
| 332                    | 322                    | 2.00                                  | 2.00                                  |                                                  |                                                  |                            |                            | 48.76                            | 5.40                            | 0.82                                         | 0.08                                        | 0.217               | 0.024              |

|     |     |       |       |        |        |      |      |       |      |      |      |       |       |
|-----|-----|-------|-------|--------|--------|------|------|-------|------|------|------|-------|-------|
| 322 | 302 | 2.00  | 2.00  | 0.7083 | 0.7082 | 1.56 | 2.03 | 48.64 | 5.40 | 0.82 | 0.08 | 0.218 | 0.024 |
| 302 | 293 | 2.00  | 4.00  | 0.7082 | 0.7075 | 1.56 | 1.40 | 56.18 | 7.80 | 0.56 | 0.06 | 0.365 | 0.051 |
| 293 | 289 | 4.00  | 1.00  |        |        |      |      | 33.12 | 4.20 | 0.56 | 0.06 | 0.215 | 0.027 |
| 289 | 272 | 1.00  | 4.00  | 0.7075 | 0.7073 | 1.56 | 1.28 | 54.26 | 7.80 | 0.51 | 0.05 | 0.385 | 0.055 |
| 272 | 260 | 4.00  | 1.00  | 0.7073 | 0.7069 | 1.56 | 1.03 | 29.18 | 4.20 | 0.41 | 0.04 | 0.258 | 0.037 |
| 260 | 255 | 1.00  | 5.00  |        |        |      |      | 71.33 | 9.00 | 0.73 | 0.08 | 0.356 | 0.045 |
| 255 | 252 | 5.00  | 0.00  |        |        |      |      | 29.16 | 3.00 | 0.73 | 0.08 | 0.146 | 0.015 |
| 252 | 250 | 0.00  | 5.00  | 0.7069 | 0.7080 | 1.56 | 1.82 | 71.33 | 9.00 | 0.73 | 0.08 | 0.356 | 0.045 |
| 250 | 248 | 5.00  | -1.00 |        |        |      |      | 20.73 | 1.80 | 0.73 | 0.08 | 0.104 | 0.009 |
| 248 | 247 | -1.00 | 5.00  |        |        |      |      | 71.60 | 8.83 | 0.73 | 0.08 | 0.358 | 0.044 |
| 247 | 236 | 2.00  | 3.00  | 0.7080 | 0.7076 | 1.56 | 1.47 | 49.49 | 6.60 | 0.59 | 0.06 | 0.306 | 0.041 |
| 236 | 216 | 3.00  | 2.50  | 0.7076 | 0.7079 | 1.56 | 1.72 | 48.91 | 6.00 | 0.69 | 0.07 | 0.259 | 0.032 |
| 216 | 201 | 2.50  | 1.00  |        |        |      |      | 30.67 | 4.20 | 0.47 | 0.05 | 0.238 | 0.033 |
| 201 | 189 | 1.00  | 3.00  | 0.7079 | 0.7071 | 1.56 | 1.17 | 45.23 | 6.60 | 0.47 | 0.05 | 0.351 | 0.051 |
| 189 | 182 | 3.00  | 1.50  |        |        |      |      | 34.31 | 4.80 | 0.47 | 0.05 | 0.267 | 0.037 |
| 182 | 176 | 1.50  | 1.00  | 0.7071 | 0.7073 | 1.56 |      | 31.95 | 4.20 | 0.52 | 0.05 | 0.225 | 0.030 |
| 176 | 166 | 1.00  | 0.00  | 0.7073 | 0.7073 | 1.56 | 1.29 | 24.46 | 3.00 | 0.52 | 0.05 | 0.172 | 0.021 |
| 166 | 164 | 0.00  | 3.00  | 0.7073 | 0.7068 | 1.56 | 0.95 | 36.43 | 6.58 | 0.38 | 0.04 | 0.351 | 0.063 |
| 164 | 146 | 3.00  | 2.00  |        |        |      |      | 48.51 | 5.40 | 0.81 | 0.08 | 0.218 | 0.024 |
| 146 | 130 | 1.50  | 1.50  | 0.7068 | 0.7075 | 2.22 | 2.02 | 44.12 | 4.80 | 0.81 | 0.08 | 0.199 | 0.022 |
| 130 | 126 | 1.50  | 2.50  |        |        |      |      | 52.91 | 6.00 | 0.81 | 0.08 | 0.238 | 0.027 |
| 125 | 114 | 2.50  | 2.00  | 0.7075 | 0.7072 | 2.22 | 1.74 | 45.03 | 5.40 | 0.70 | 0.07 | 0.235 | 0.028 |
| 114 | 108 | 2.00  | 2.00  | 0.7072 | 0.7073 | 2.22 | 1.84 | 46.28 | 5.40 | 0.74 | 0.08 | 0.229 | 0.027 |
| 108 | 96  | 2.00  | 2.00  | 0.7073 | 0.7074 | 2.22 | 1.88 | 46.77 | 5.40 | 0.76 | 0.08 | 0.226 | 0.026 |
| 96  | 90  | 2.00  | 2.00  | 0.7074 | 0.7073 | 2.22 | 1.77 | 45.41 | 5.40 | 0.71 | 0.07 | 0.233 | 0.028 |
| 90  | 66  | 2.00  | 2.00  | 0.7073 | 0.7077 | 2.22 | 2.22 | 51.00 | 5.40 | 0.89 | 0.09 | 0.209 | 0.022 |
| 66  | 62  | 2.00  | 1.00  |        |        |      |      | 32.48 | 4.20 | 0.54 | 0.06 | 0.220 | 0.029 |
| 62  | 58  | 1.00  | 3.00  | 0.7077 | 0.7077 | 1.37 | 1.34 | 47.64 | 6.60 | 0.54 | 0.06 | 0.323 | 0.045 |
| 58  | 52  | 3.00  | 0.00  |        |        |      |      | 24.90 | 3.00 | 0.54 | 0.06 | 0.169 | 0.020 |
| 52  | 35  | 0.00  | 1.00  |        |        |      |      | 32.48 | 4.20 | 0.54 | 0.06 | 0.220 | 0.029 |
| 35  | 0   | 1.00  | 0.00  | 0.7077 | 0.7092 | 1.37 | 2.90 | 49.10 | 4.20 | 1.17 | 0.12 | 0.154 | 0.013 |

Table.S2. Parameters used in the simulation

| parameters                                    | values                   | unit  | reference |
|-----------------------------------------------|--------------------------|-------|-----------|
| $\text{Mo}_{\text{Sr}}^0$                     | 1.12E+19                 | g     | 21        |
| $\text{Mo}_{\text{C}}^0$                      | 3.90E+19                 | g     | 30        |
| $(^{87}\text{Sr}/^{86}\text{Sr})_{\text{r}}$  | 0.712                    |       | 21        |
| $(^{87}\text{Sr}/^{86}\text{Sr})_{\text{hy}}$ | 0.704                    |       | 21        |
| Fcarb                                         | N(130,30 <sup>2</sup> )  | Tg/yr | 30        |
| $\delta_{\text{sil}}$                         | -5.00                    | ‰     | 29        |
| $\delta_{\text{carb}}$                        | -2.50                    | ‰     | 29        |
| $\Delta$                                      | 25.00                    | ‰     | 31        |
| RED                                           | 106                      |       | 23-25     |
| Sr (crust)                                    | 320                      | ppm   | 33        |
| P (crust)                                     | N(655,130 <sup>2</sup> ) | ppm   | 2,32      |
| $f_{\text{dp}}$                               | 0.08                     |       | 15,21     |
| A                                             | 89                       |       | 30        |
